# Supplementary material for: Coordination-induced bond weakening of water at the surface of an oxygen-deficient polyoxovanadate cluster
Source: Royal Society of Chemistry journal article supplement (doi:10.1039/d2sc04843d), 2022-01-01
Supplement: d2sc04843d1.pdf [file d2sc04843d1.pdf]

## Electronic Supporting Information (ESI)

### Coordination-induced Bond Weakening of Water at the Surface of an Oxygen-deficient Polyoxovanadate Cluster

Shannon E. Cooney, Alex A. Fertig,\* Madeleine R. Buisch, William W. Brennessel, and Ellen M. Matson\*

*Department of Chemistry, University of Rochester, Rochester, New York 14627*

#### Supporting Information Table of Contents:

|                                                                                                                                                                |     |
|----------------------------------------------------------------------------------------------------------------------------------------------------------------|-----|
| <b>Figure S1.</b> $^1\text{H}$ NMR spectrum of <b>(calix)V<sub>6</sub>O<sub>5</sub>(OH<sub>2</sub>)</b> .....                                                  | S2  |
| <b>Figure S2.</b> $^1\text{H}$ NMR spectrum of <b>(calix)V<sub>6</sub>O<sub>6</sub></b> .....                                                                  | S2  |
| <b>Figure S3.</b> Electronic absorption spectra of <b>(calix)V<sub>6</sub>O<sub>5</sub>(OH<sub>2</sub>)</b> and <b>(calix)V<sub>6</sub>O<sub>6</sub></b> ..... | S3  |
| <b>Table S1.</b> Crystallographic parameters of <b>(calix)V<sub>6</sub>O<sub>5</sub>(OH<sub>2</sub>)</b> .....                                                 | S4  |
| <b>Table S2.</b> Bond valence sum calculations for <b>(calix)V<sub>6</sub>O<sub>5</sub>(OH<sub>2</sub>)</b> .....                                              | S4  |
| <b>Figure S4.</b> $^1\text{H}$ NMR spectrum of crude reaction of <b>(calix)V<sub>6</sub>O<sub>6</sub></b> with hydrazobenzene .....                            | S5  |
| <b>Figure S5.</b> $^1\text{H}$ NMR spectrum <b>(calix)V<sub>6</sub>O<sub>6</sub></b> + 1 eq H <sub>2</sub> NQ over 12 hours .....                              | S5  |
| <b>Figure S6.</b> $^1\text{H}$ NMR spectrum of <b>(calix)V<sub>6</sub>O<sub>5</sub>(OH<sub>2</sub>)</b> + 1 eq NQ .....                                        | S6  |
| <b>Figure S7.</b> Cyclic voltammogram of <b>(calix)V<sub>6</sub>O<sub>6</sub></b> in THF.....                                                                  | S6  |
| <b>Figure S8.</b> Cyclic voltammogram of the reduction of TEMPO .....                                                                                          | S7  |
| <b>Figure S9.</b> Raw kinetic trace of reaction between <b>(calix)V<sub>6</sub>O<sub>5</sub>(OH<sub>2</sub>)</b> and TEMPO.....                                | S7  |
| <b>Figure S10.</b> Worked up kinetic trace of reaction between <b>(calix)V<sub>6</sub>O<sub>5</sub>(OH<sub>2</sub>)</b> and TEMPO.....                         | S8  |
| <b>Figure S11</b> $^1\text{H}$ NMR spectrum of <b>(calix)V<sub>6</sub>O<sub>5</sub>(OD<sub>2</sub>)</b> .....                                                  | S9  |
| <b>Figure S12.</b> Electronic absorption spectra of <b>(calix)V<sub>6</sub>O<sub>5</sub>(OD<sub>2</sub>)</b> .....                                             | S9  |
| <b>Figure S13.</b> $^2\text{H}$ NMR spectrum of TEMPO-D .....                                                                                                  | S10 |
| <b>Figure S14.</b> $k_{\text{obs}}$ vs. [TEMPO] for the reaction between <b>(calix)V<sub>6</sub>O<sub>5</sub>(OD<sub>2</sub>)</b> and TEMPO .....              | S10 |

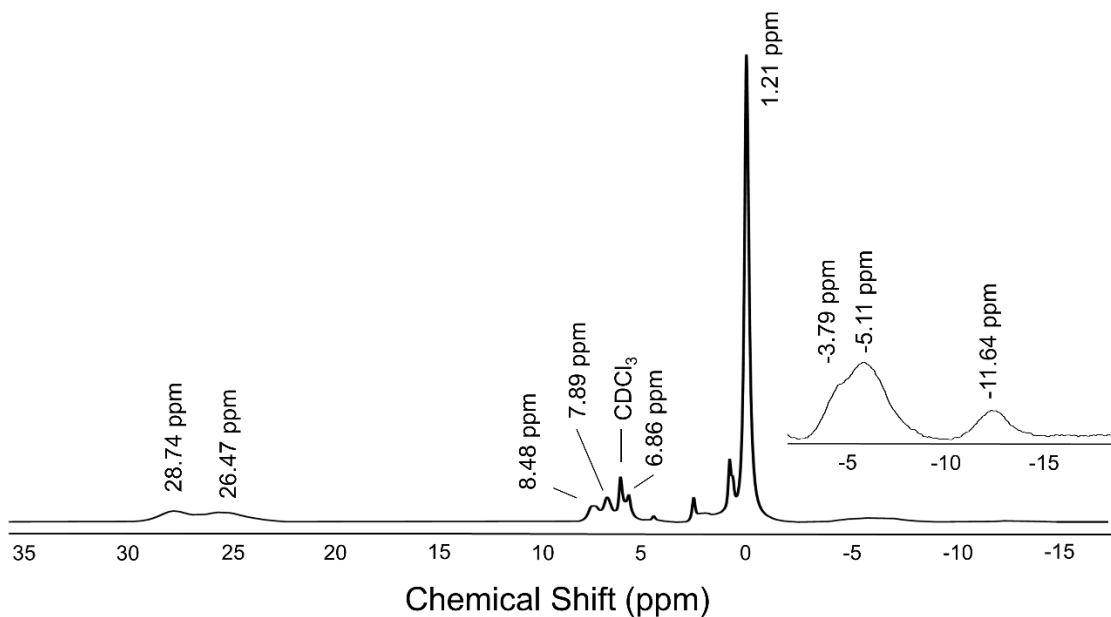

**Figure S1.**  $^1\text{H}$  NMR spectrum of  $(\text{calix})\text{V}_6\text{O}_5(\text{OH}_2)$ , collected in  $\text{CDCl}_3$  at  $21^\circ\text{C}$ .

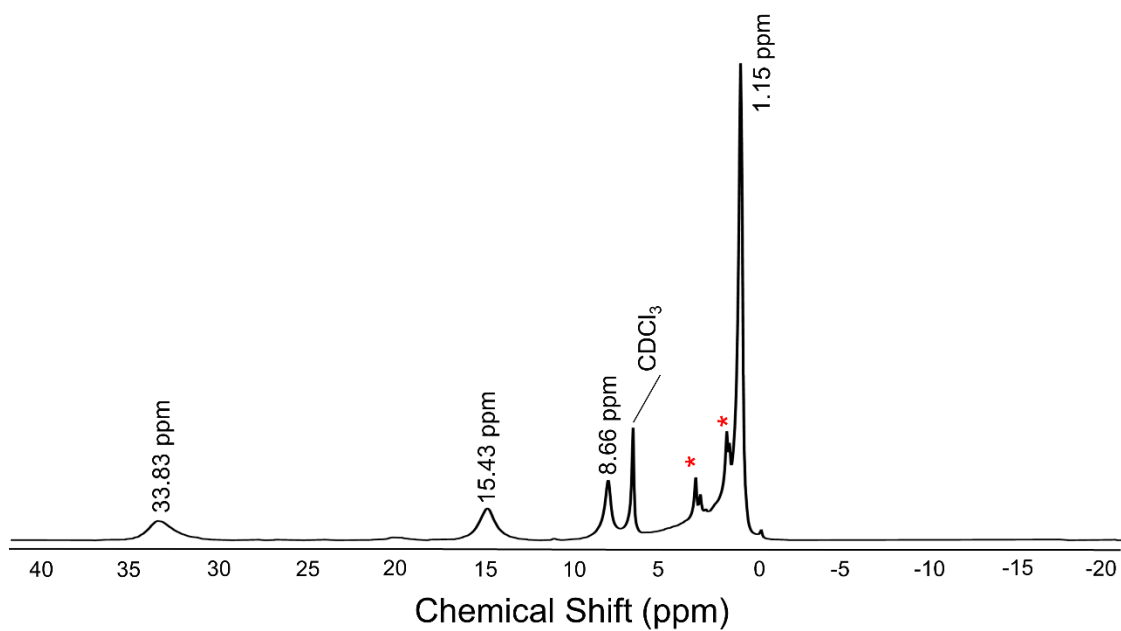

**Figure S2.**  $^1\text{H}$  NMR spectrum of  $(\text{calix})\text{V}_6\text{O}_6$ , collected in  $\text{CDCl}_3$  at  $21^\circ\text{C}$ , red asterisk indicates residual THF solvent.

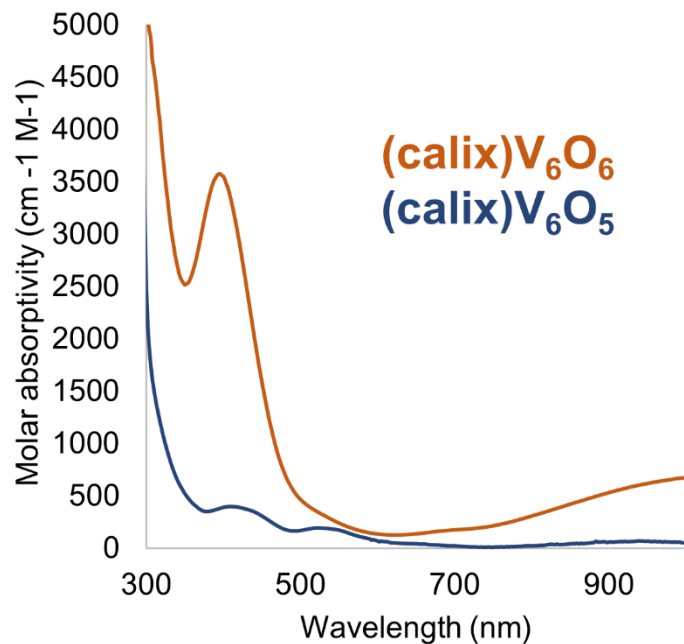

**Figure S3.** Electronic absorption spectra of **(calix)V<sub>6</sub>O<sub>5</sub>(OH<sub>2</sub>)** (blue), and **(calix)V<sub>6</sub>O<sub>6</sub>** (orange) in tetrahydrofuran.

**Table S1:** Crystallographic parameters for molecular structure of **(calix)V<sub>6</sub>O<sub>5</sub>(OH<sub>2</sub>)**.

|                                                     |                                                                                                                                    |
|-----------------------------------------------------|------------------------------------------------------------------------------------------------------------------------------------|
| Empirical formula                                   | C <sub>52</sub> H <sub>76</sub> O <sub>19</sub> V <sub>6</sub>                                                                     |
| Formula weight                                      | 1577.57                                                                                                                            |
| Temperature / K                                     | 173.00(10) K                                                                                                                       |
| Wavelength / Å                                      | 1.54184 Å                                                                                                                          |
| Crystal system                                      | orthorhombic                                                                                                                       |
| Space group                                         | <i>Pbcm</i>                                                                                                                        |
| Unit cell dimensions                                | <i>a</i> = 14.4807(2) Å<br><i>b</i> = 27.8595(5) Å<br><i>c</i> = 18.7836(2) Å<br>$\alpha$ = 90°<br>$\beta$ = 90°<br>$\gamma$ = 90° |
| Volume / Å <sup>3</sup>                             | 7577.78(19) Å <sup>3</sup>                                                                                                         |
| Z                                                   | 4                                                                                                                                  |
| Reflections collected                               | 48002                                                                                                                              |
| Independent reflections                             | 8377 [ <i>R</i> (int) = 0.0397]                                                                                                    |
| Completeness to theta = 67.684°                     | 99.9%                                                                                                                              |
| Goodness-of-fit on <i>F</i> <sup>2</sup>            | 1.038                                                                                                                              |
| Final <i>R</i> indices [ <i>I</i> > 2σ( <i>I</i> )] | <i>R</i> 1 = 0.0644, <i>wR</i> 2 = 0.1861                                                                                          |
| Largest diff. peak and hole                         | 0.665 and -0.479 e.Å <sup>-3</sup>                                                                                                 |

**Table S2.** Bond valence sum (BVS) calculations for crystallographically independent vanadium ions in **(calix)V<sub>6</sub>O<sub>5</sub>(OH<sub>2</sub>)** based on X-ray crystallographic data collected at 100 K. Table reflects the results of BVS calculations using V-O bond valence parameters (*r*<sub>0</sub>) for different oxidation states of vanadium.

| <b>(calix)V<sub>6</sub>O<sub>5</sub>(OH<sub>2</sub>)</b> | V1           | V2           | V3           | V4           | V5           |
|----------------------------------------------------------|--------------|--------------|--------------|--------------|--------------|
| V(III)                                                   | <b>3.194</b> | 3.826        | 3.921        | <b>3.051</b> | 3.814        |
| V(IV)                                                    | 3.270        | <b>3.917</b> | <b>4.015</b> | 3.124        | <b>3.905</b> |
| V(V)                                                     | 3.513        | 4.178        | 4.278        | 3.359        | 4.167        |

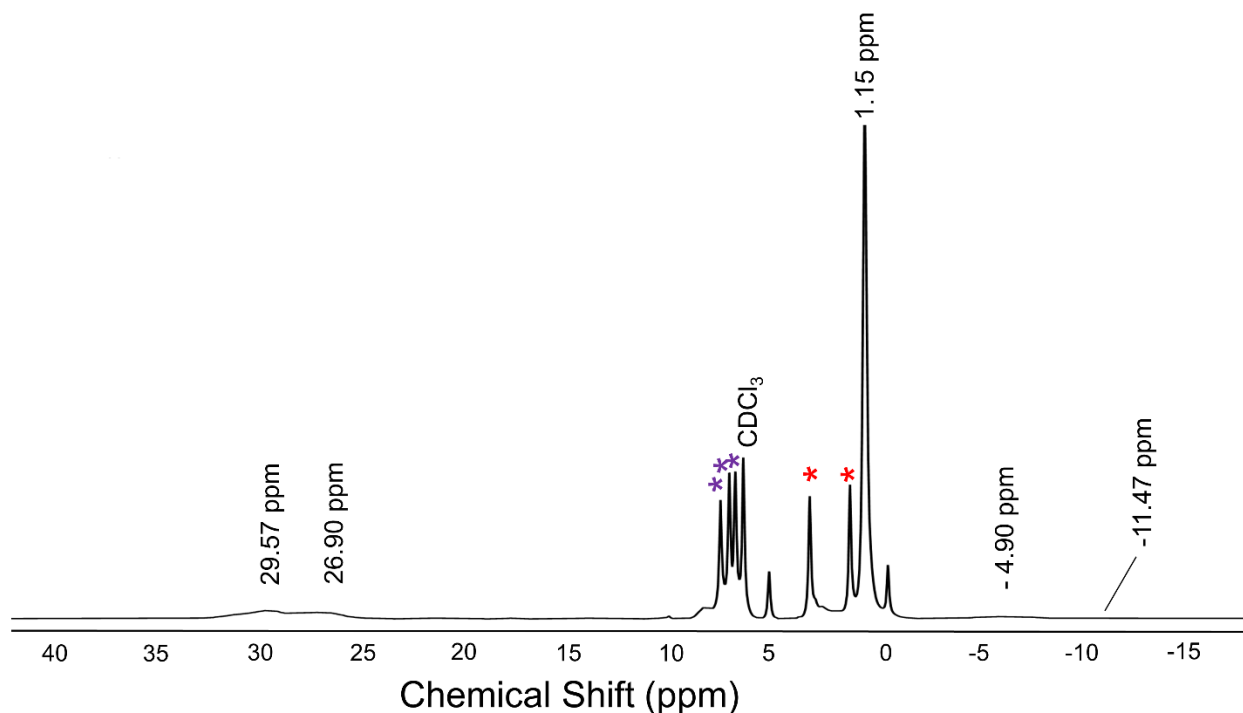

**Figure S4.**  $^1\text{H}$  NMR spectrum of crude reaction of **(calix) $\text{V}_6\text{O}_6$**  with hydrazobenzene after 5 hours at 25 °C. Red asterisks are residual solvent (THF) and purple asterisk indicate azobenzene.

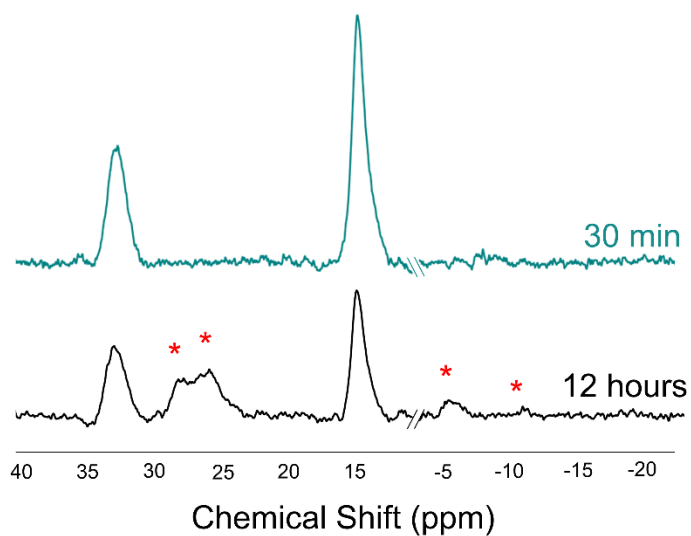

**Figure S5.**  $^1\text{H}$  NMR spectrum **(calix) $\text{V}_6\text{O}_6$**  + 1 eq  $\text{H}_2\text{NQ}$  after 30 minutes (top, teal) in  $\text{THF-d}_8$ . Reaction reached equilibrium at 25 °C after 12 hours (bottom, black). Red asterisks indicate the formation of **(calix) $\text{V}_6\text{O}_5(\text{OH}_2)$** .

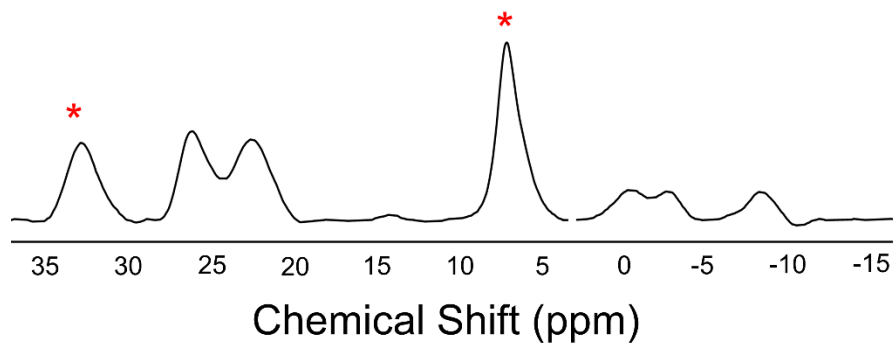

**Figure S6.**  $^1\text{H}$  NMR spectrum of  $(\text{calix})\text{V}_6\text{O}_5(\text{OH}_2) + 1 \text{ eq NQ}$  in  $\text{THF-d}_8$ . Red asterisks indicate the formation of  $(\text{calix})\text{V}_6\text{O}_6$  after 12 at  $25^\circ\text{C}$ .

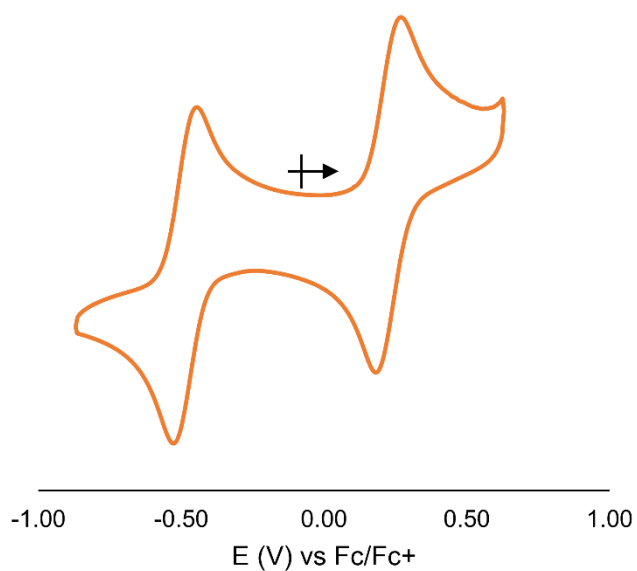

**Figure S7.** Cyclic voltammogram  $1 \text{ mM } (\text{calix})\text{V}_6\text{O}_6$  with  $100 \text{ mM } [\text{NBu}_4][\text{PF}_6]$  electrolyte at a scan rate of  $20 \text{ mV s}^{-1}$  in THF.

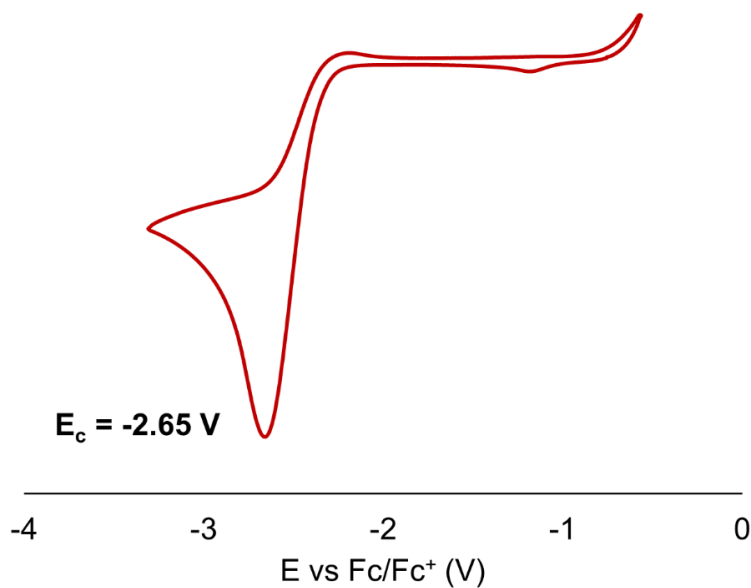

**Figure S8.** Cyclic Voltammogram of the irreversible reduction of TEMPO in THF vs Fc/Fc<sup>+</sup> with 0.1 M TBAPF<sub>6</sub> as a counter electrolyte.

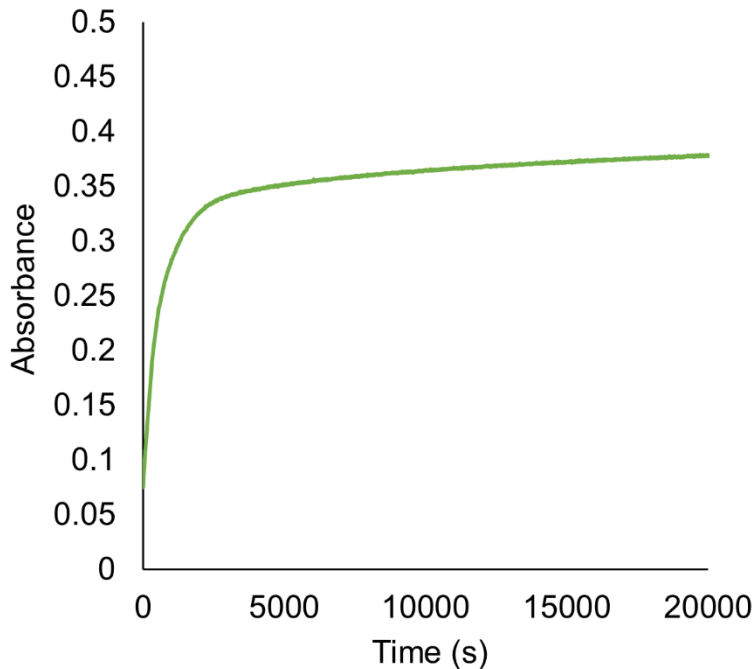

**Figure S9.** Absorbance trace for the reaction between 0.5 mM (**calix**)V<sub>6</sub>O<sub>5</sub>(OH<sub>2</sub>), and 43 mM TEMPO in THF. The extent of the reaction was monitored at 900 nm. Experiment was performed at 25 °C.

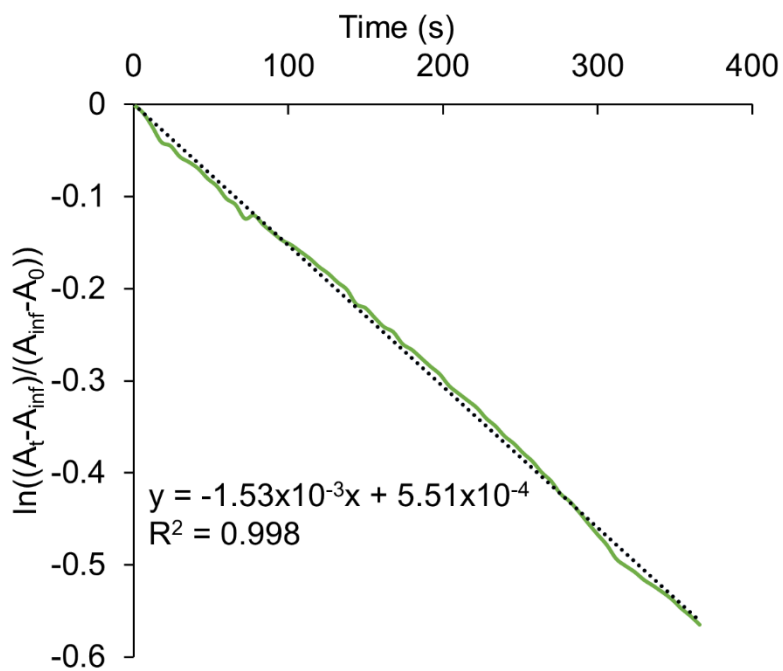

**Figure S10.** Plot used to obtain the pseudo first-order rate constant for kinetic experiments performed in this work. Plotting  $\ln(A_t - A_{inf}/A_{inf} - A_0)$  against time results in a linear trend, from which the  $k_{obs}$  value can be determined from the absolute value of the slope.  $A_t$  = absorbance at time =  $t$ ,  $A_{inf}$  = absorbance at equilibrium, and  $A_0$  = initial absorbance.



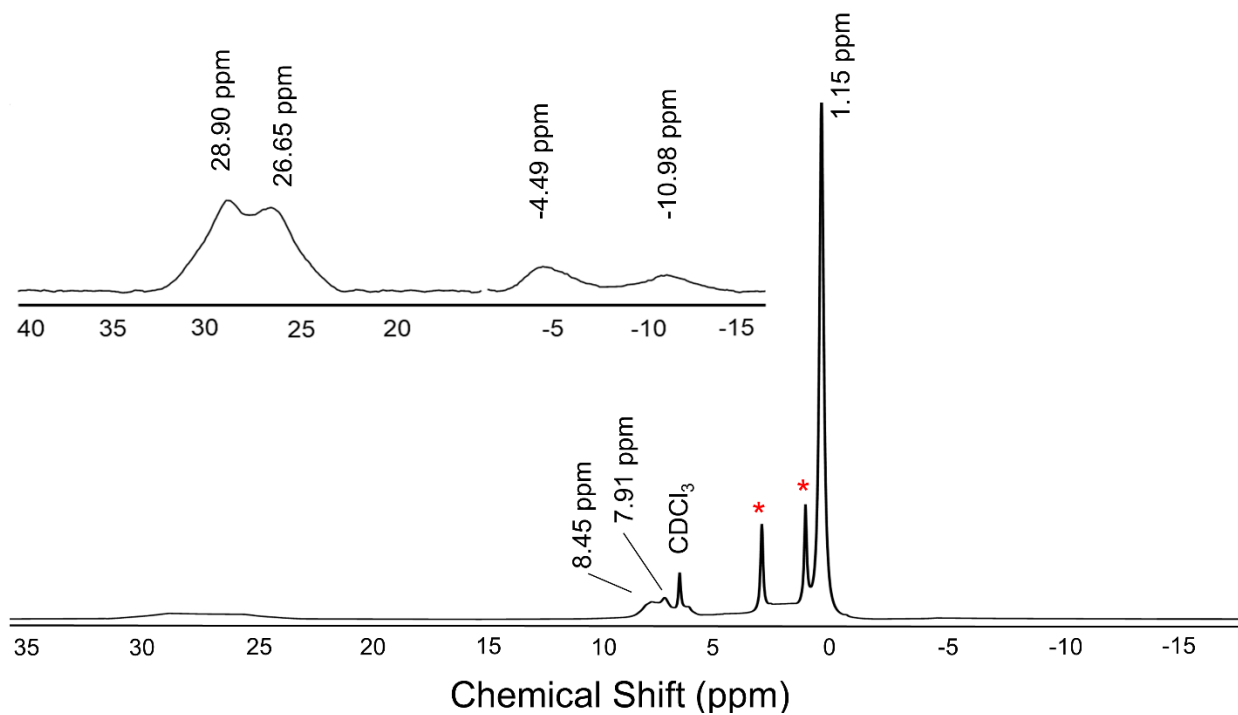

**Figure S11.**  $^1\text{H}$  NMR spectrum of  $(\text{calix})\text{V}_6\text{O}_5(\text{OD}_2)$  in  $\text{CDCl}_3$ , red asterisks indicate residual THF.

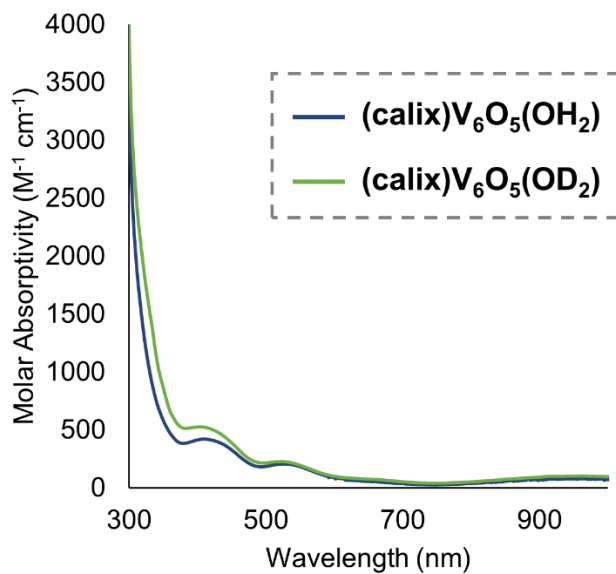

**Figure S12.** Comparison of the electronic absorption spectra for  $(\text{calix})\text{V}_6\text{O}_5(\text{OH}_2)$  and  $(\text{calix})\text{V}_6\text{O}_5(\text{OD}_2)$ . Both samples were collected in THF at 21 °C. The similarity of both spectra suggests the successful isolation of the deuterated cluster.

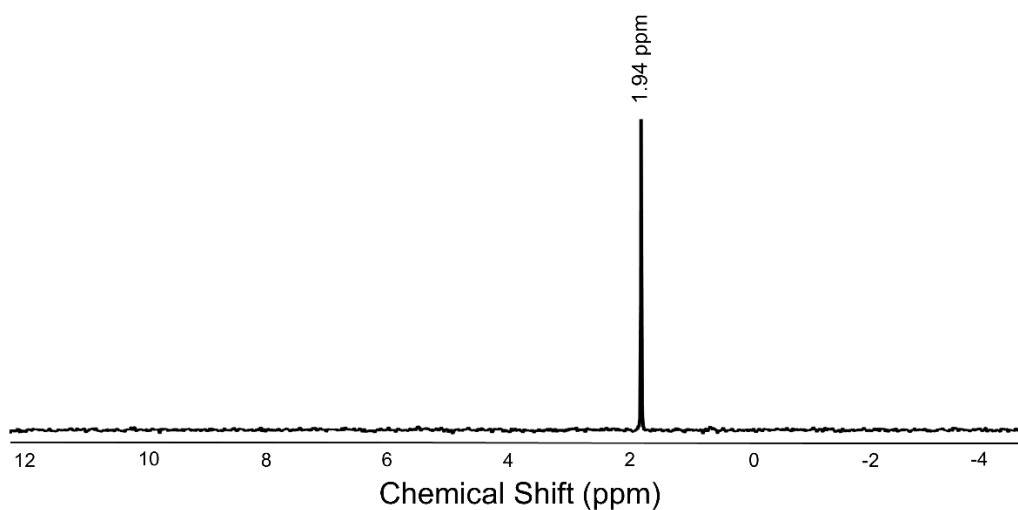

**Figure S13.**  $^2\text{H}$  NMR spectrum of TEMPO-D in tetrahydrofuran after a reaction of  $(\text{calix})\text{V}_6\text{O}_5(\text{OD}_2)$  with 2 eq. TEMPO.

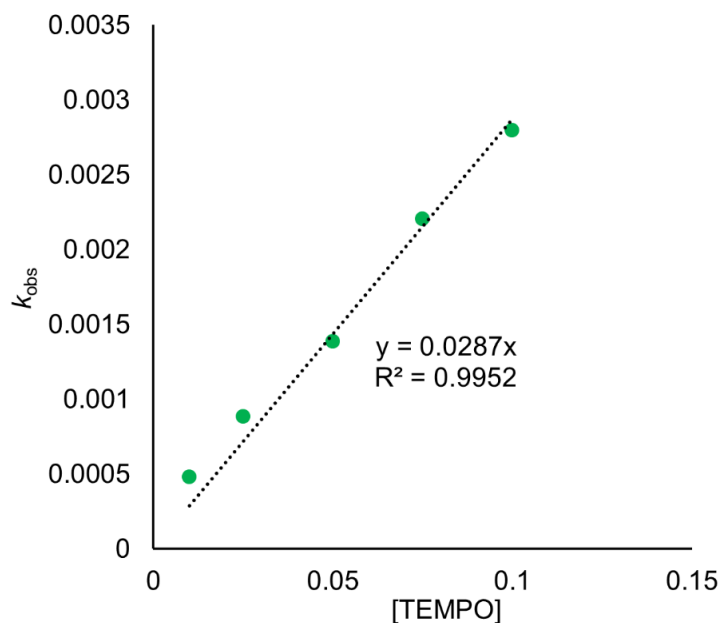

**Figure S14.** Plot of the observed rate constant,  $k_{\text{obs}}$ , collected for the reaction between  $(\text{calix})\text{V}_6\text{O}_5(\text{OD}_2)$  and TEMPO against the concentration of TEMPO originally in solution. Each experiment was run with 0.5 mM of  $(\text{calix})\text{V}_6\text{O}_5(\text{OD}_2)$  initially in the solution. The linear trend of the plotted results indicates first order with respect to TEMPO, where the second order rate constant for the reaction,  $k_{\text{PCET-D}}$ , is determined from the slope of the best fit line with a Y-intercept of 0. Of note,  $k_{\text{PCET-D}}$  is equal to  $\frac{1}{2}$  the slope of the line in order to account for the two chemically identical D atoms at the reduced cluster.
